# Supplementary material for: A direct Z-scheme PtS2/arsenene van der Waals heterostructure with high photocatalytic water splitting efficiency
Source: Royal Society of Chemistry journal article supplement (doi:10.1039/d0nr02286a), 2020-01-01
Supplement: d0nr02286a1.pdf [file d0nr02286a1.pdf]

## A Direct Z-Scheme PtS<sub>2</sub>/Arsenene van der Waals Heterostructure with High Photocatalytic Water Splitting Efficiency

Kai Ren<sup>a,b</sup>, Wencheng Tang<sup>a,\*</sup>, Minglei Sun<sup>a</sup>, Yongqing Cai<sup>c</sup>, Yuan Cheng<sup>b</sup> and Gang Zhang<sup>b,\*</sup>

<sup>a</sup> School of Mechanical Engineering, Southeast University, Nanjing, Jiangsu 211189, China

<sup>b</sup> Institute of High Performance Computing, A\*STAR, Singapore 138632, Singapore

<sup>c</sup> Institute of Applied Physics and Materials Engineering, University of Macau, Taipa, Macau, China

\* E-mail address: 101000185@seu.edu.cn (Wencheng Tang); zhangg@ihpc.a-star.edu.sg (G. Zhang)

### 1. Effect of SOC

The band structures of the PtS<sub>2</sub>/Are vdW heterostructure calculated by PBE functional with or without spin-orbit coupling (SOC) are shown in Fig. S1. It is clear that SOC has negligible effect on the band gap and band alignment of the PtS<sub>2</sub>/Are vdW heterostructure.

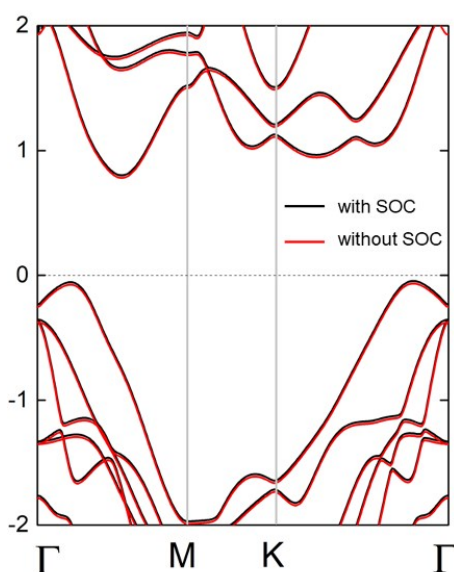

**Fig. S1.** The band structure of the PtS<sub>2</sub>/Are vdW heterostructure with and without spin-orbit coupling calculated by PBE calculations.

## 2. The different stacking configurations

When the vertical heterostructure was constructed by PtS<sub>2</sub> and Are monolayers, 6 representative stacking configurations, stacking-A, stacking-B, stacking-C, stacking-D, stacking-E and stacking-F, are considered, as shown in Fig. S2. As for stacking-A configuration, the lower As atoms of the Arsenene (Are) are located on the top of Pt atoms of the PtS<sub>2</sub>, while the upper As atoms are on the top of the top of the upper S atoms. For stacking-B configuration, the lower As atoms of the Are still locate on the top of Pt atoms of the PtS<sub>2</sub>, but the upper As atoms are on the top of lower S atoms. Putting the upper As atoms on the top of the upper S atoms and the lower As atoms on the top of the lower S atoms will obtain the stacking-C configuration. And for stacking-D configuration, we put the upper As atoms on the top of Pt atoms and the lower As atoms on the top of the upper S atoms. The stacking-E configuration is constructed by locating the upper As atoms on the top of Pt atoms and the lower As atoms on the lower S atoms. As for stacking-F configuration, it is built by locating the upper and lower As atoms on the lower and upper S atoms, respectively.

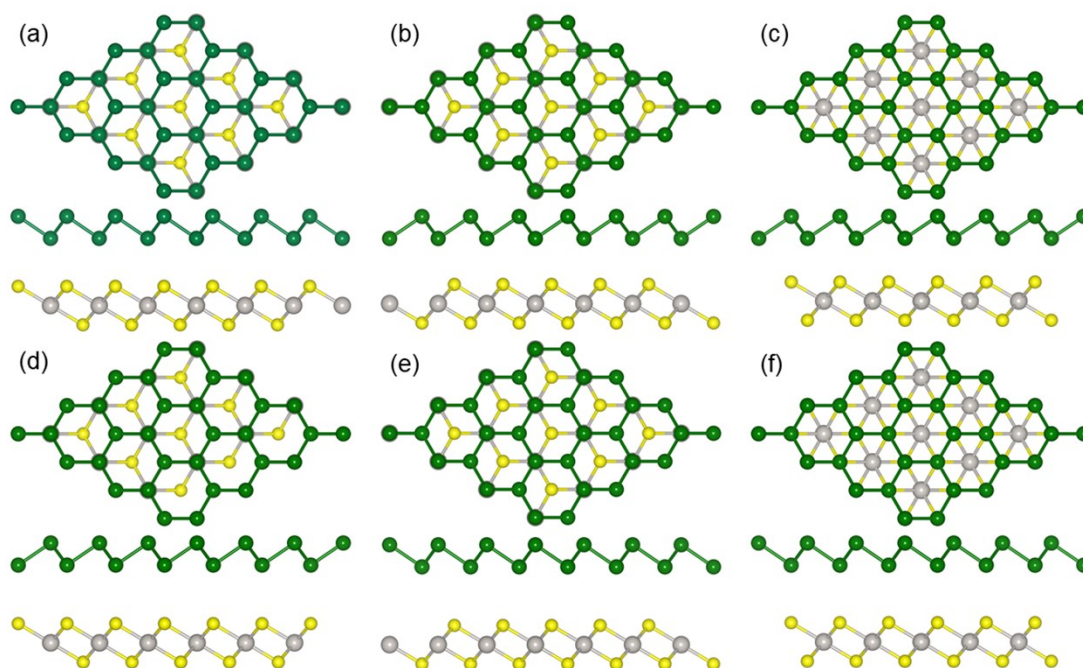

**Fig. S2.** Top and side views of the PtS<sub>2</sub>/Are heterostructure for representative stacking: (a) stacking-A, (b)

stacking-B, (c) stacking-C, (d) stacking-D, (e) stacking-E and (f) stacking-F; the yellow, gray and green balls represent S, Pt and As atoms, respectively.

The binding energy, the interlayer distance and bond length of the different stacking configurations of the PtS<sub>2</sub>/Are heterostructure are shown in Table S1. One can see that the stacking-C configuration of the PtS<sub>2</sub>/Are heterostructure has the lowest binding energy of  $-14.814 \text{ meV}/\text{\AA}^2$ , showing the formation by weaken van der Waals forces [1]. The bond length of the Pt–S and As–As in the PtS<sub>2</sub> and Are monolayers are optimized by 2.398 and 2.506  $\text{\AA}$ , respectively. And the bond length of the Pt–S and As–As in the optimized PtS<sub>2</sub>/Are heterostructure are 2.400 and 2.493  $\text{\AA}$ , respectively, which only slightly change compared with the pristine monolayer PtS<sub>2</sub> and Are, further demonstrating the formation of vdW heterostructure.

**Table S1.** Calculated binding energy ( $E_b$ ) and the interlayer distance ( $d$ ) and bond length ( $B_{\text{Pt-S}}$  and  $B_{\text{As-As}}$ ) of the different stacking configurations for the optimized PtS<sub>2</sub>/Are heterostructure.

|                                     | stacking-A | stacking-B | stacking-C | stacking-D | stacking-E | stacking-F |
|-------------------------------------|------------|------------|------------|------------|------------|------------|
| $E_b$ (meV/ $\text{\AA}^2$ )        | -13.104    | -13.861    | -14.814    | -8.217     | -14.495    | -8.487     |
| $d$ ( $\text{\AA}$ )                | 3.044      | 2.908      | 2.770      | 3.718      | 2.442      | 3.644      |
| $B_{\text{Pt-S}}$ ( $\text{\AA}$ )  | 2.398      | 2.402      | 2.400      | 2.399      | 2.391      | 2.497      |
| $B_{\text{As-As}}$ ( $\text{\AA}$ ) | 2.495      | 2.494      | 2.493      | 2.497      | 2.488      | 2.399      |

### 3. Effect of water molecule on stability of vdW heterostructure.

We also investigated the effect of water molecules ( $\text{H}_2\text{O}$ ) on the stability of Are/ $\text{PtS}_2$  vdW heterostructure by calculating the binding energy. We defined the  $\text{H}_2\text{O}$  adsorbed system heterostructure,  $\text{PtS}_2$  and Are as  $\text{PtS}_2/\text{Are}(\text{H}_2\text{O})$ ,  $\text{PtS}_2(\text{H}_2\text{O})$  and  $\text{Are}(\text{H}_2\text{O})$ , respectively, as shown in Fig. S3. The binding energy between  $\text{PtS}_2$  and Are layers can be obtained by:

$$E_{\text{b}(\text{H}_2\text{O})} = E_{\text{Are}/\text{PtS}_2(\text{H}_2\text{O})} - E_{\text{PtS}_2(\text{H}_2\text{O})} - E_{\text{Are}(\text{H}_2\text{O})}, \quad (\text{S1})$$

where  $E_{\text{PtS}_2/\text{Are}(\text{H}_2\text{O})}$ ,  $E_{\text{PtS}_2(\text{H}_2\text{O})}$  and  $E_{\text{Are}(\text{H}_2\text{O})}$  are the total energy of the  $\text{H}_2\text{O}$  adsorbed  $\text{PtS}_2/\text{Are}$  heterostructure,  $\text{H}_2\text{O}$  adsorbed  $\text{PtS}_2$  and  $\text{H}_2\text{O}$  adsorbed Are systems, respectively.  $E_{\text{b}}$  is  $-26.395 \text{ meV}/\text{\AA}^2$ , which demonstrates the stability of the Are/ $\text{PtS}_2$  vdW heterostructure.

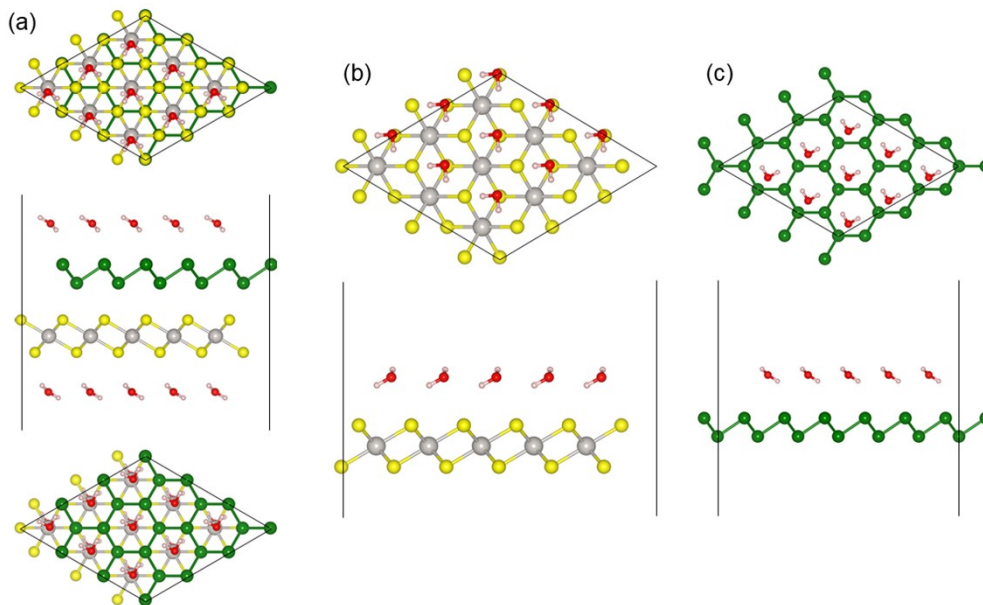

**Fig. S3.** (a) The  $\text{H}_2\text{O}$  adsorbed  $\text{PtS}_2/\text{Are}$  vdW heterostructure, (b)  $\text{H}_2\text{O}$  adsorbed  $\text{PtS}_2$  and (c)  $\text{H}_2\text{O}$  adsorbed Are system. The yellow, gray and green, red and pink balls represent S, Pt, As, O and H atoms, respectively.

#### 4. Exciton binding energy

The exciton binding energy ( $E_{eb}$ ) can quantitatively evaluate the recombination rate of the photogenerated electron–hole pairs. The  $E_{eb}$  of the monolayer Are, PtS<sub>2</sub> and PtS<sub>2</sub>/Are vdW heterostructure are calculated through Mott-Wannier hydrogenic model [S2]:

$$E_{eb} = \frac{13.6\mu_{ex}}{m_0\epsilon^2}, \mu_{ex} = \frac{m_e m_h}{m_e + m_h} \quad (\text{S2})$$

where  $\mu_{ex}$  is the effective exciton mass, and  $\epsilon$  is the macroscopic static dielectric constant, which is the sum of electronic ( $\epsilon_{el}$ ) and ionic ( $\epsilon_{ion}$ ) contributions, respectively. The higher value of  $E_{eb}$  corresponds to the more difficult separation of the photogenerated electron-hole pairs. In Table S2, the  $E_{eb}$  of the PtS<sub>2</sub>/Are vdW heterostructure is 0.47 eV, which is smaller than monolayer Are of 0.49 eV and PtS<sub>2</sub> of 1.34 eV. Therefore, the PtS<sub>2</sub>/Are vdW heterostructure can remarkably improve the efficiency of the photocatalysis for water splitting, compared to the monolayer Are and PtS<sub>2</sub>.

**Table S2.** The  $\epsilon_{el}$ ,  $\epsilon_{ion}$  and  $E_{eb}$  of monolayer Are, PtS<sub>2</sub> and Are/PtS<sub>2</sub> vdW heterostructure.

|                      | $\epsilon_{el}$ |      |      | $\epsilon_{ion}$ |      |      | $E_{eb}$ |
|----------------------|-----------------|------|------|------------------|------|------|----------|
|                      | x               | y    | z    | x                | y    | z    |          |
| Are                  | 0.02            | 0.02 | 0.03 | 3.97             | 3.97 | 1.20 | 0.49     |
| PtS <sub>2</sub>     | 0.02            | 0.02 | 0.01 | 3.97             | 3.97 | 1.18 | 1.34     |
| Are/PtS <sub>2</sub> | 2.58            | 2.58 | 1.89 | 7.07             | 7.07 | 1.34 | 0.47     |

## 5. The band edge positions of the Are and PtS<sub>2</sub> monolayers

The band edge positions of the Are and PtS<sub>2</sub> monolayers are shown in Fig. S4. It is clear that both Are and PtS<sub>2</sub> monolayers possess decent potentials of the CBM and VBM for the reduction and oxidation reaction at pH=0. The overpotentials of  $\chi(\text{H}_2)$  and  $\chi(\text{O}_2)$  for Are and PtS<sub>2</sub> monolayers are 0.848 eV and 1.375 eV, respectively, which demonstrate the HER activity of Ars and OER activity of PtS<sub>2</sub>.

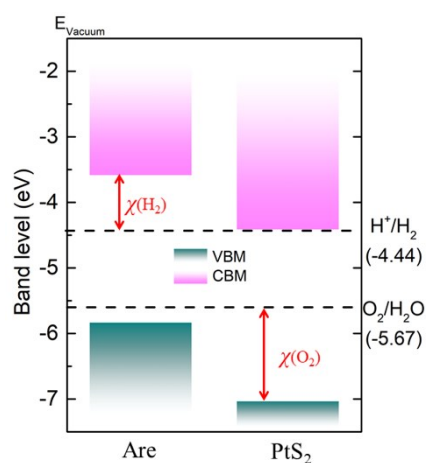

**Fig. S4.** The band alignment of the Are and PtS<sub>2</sub> monolayers with respect to the water oxidation (O<sub>2</sub>/H<sub>2</sub>O) and reduction (H<sup>+</sup>/H<sub>2</sub>) potentials at pH=0. All results are obtained by HSE06 functional calculation.

## 6. Optical absorption spectrum

Because most of the data in literature is obtained from HSE06 calculations, for a fair comparison, we also calculated the optical absorption of the PtS<sub>2</sub>/Are vdW heterostructure with HSE06 functional. As shown in Fig. S5, in ultraviolet (UV) region, the absorption peaks of PtS<sub>2</sub>, Are monolayers and PtS<sub>2</sub>/Are vdW heterostructure are  $5.404 \times 10^5$ ,  $9.120 \times 10^5$  and  $10.346 \times 10^5$  cm<sup>-1</sup> located at the wavelength of 311.557, 232.768 and 245.652 nm, respectively. Meanwhile, near the visible light spectrum, the HSE06 functional calculated absorption peaks of PtS<sub>2</sub>, Are monolayers and PtS<sub>2</sub>/Are vdW heterostructure are  $4.738 \times 10^5$ ,  $2.495 \times 10^5$  and  $4.594 \times 10^5$  cm<sup>-1</sup>, respectively. The optical absorption ability of the PtS<sub>2</sub>/Are vdW heterostructure is superior to other TMDs-based vdW heterostructures, such as TMDs/GeC (about  $1.902$ – $4.548 \times 10^5$  cm<sup>-1</sup>) [S3], TMDs/BSe (about  $0.451$ – $1.715 \times 10^5$  cm<sup>-1</sup>) [S4] and TMDs/Mg(OH)<sub>2</sub> (about  $1.511$ – $1.934 \times 10^5$  cm<sup>-1</sup>) [S5] heterostructures.

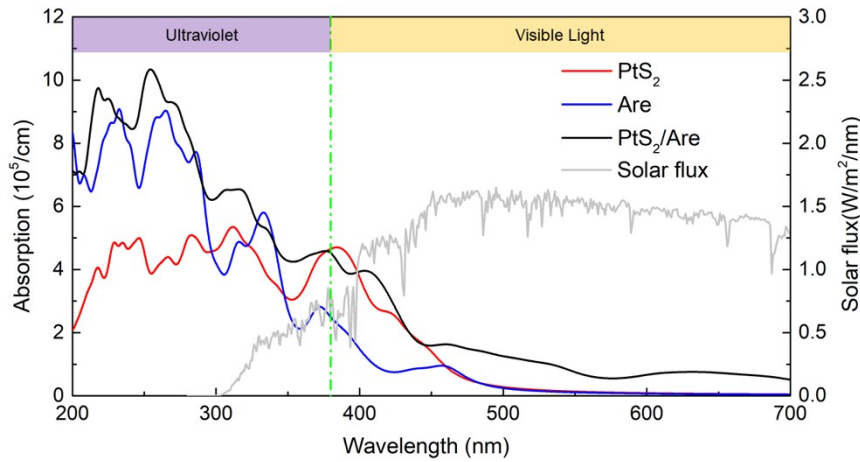

**Fig. S5.** The optical absorption spectrum of the monolayer PtS<sub>2</sub>, Are and PtS<sub>2</sub>/Are vdW heterostructure calculated by HSE06 functional.

## References

- [S1] X. Chen, F. Tian, C. Persson, W. Duan, N.X. Chen, Interlayer interactions in graphites, *Sci. Rep.*, 3 (2013) 3046.
- [S2] B. Ram, A.K. Singh, Strain-induced indirect-to-direct band-gap transition in bulk SnS<sub>2</sub>, *Phys. Rev. B*, 95 (2017), 075134.
- [S3] K. Ren, M. Sun, Y. Luo, S. Wang, Y. Xu, J. Yu, W. Tang, Electronic and optical properties of van der Waals vertical heterostructures based on two-dimensional transition metal dichalcogenides: First-principles calculations, *Phys. Lett. A*, 383 (2019) 1487–1492.
- [S4] Y. Luo, K. Ren, S. Wang, J.-P. Chou, J. Yu, Z. Sun, M. Sun, First-Principles Study on Transition-Metal Dichalcogenide/BSe van der Waals Heterostructures: A Promising Water-Splitting Photocatalyst, *J. Phys. Chem. C*, 123 (2019) 22742–22751.
- [S5] Y. Luo, S. Wang, K. Ren, J.P. Chou, J. Yu, Z. Sun, M. Sun, Transition-metal dichalcogenides/Mg(OH)<sub>2</sub> van der Waals heterostructures as promising water-splitting photocatalysts: a first-principles study, *Phys Chem Chem Phys*, 21 (2019) 1791–1796.
